# Supplementary material
Source: MDPI journal article supplement (https://www.mdpi.com/2072-4292/12/16/2652)
Supplement: s1 [file s1]

**Supplementary Data:** Table S1. CEOS WGCV LPV supersites and S3VT 'core' validation sites. The land cover assigned to each site is based on Global Land Cover 2000 (GLC2000) product.

| No | Site acronym        | Country        | Network                          | Lat     | Lon      | Land cover                     |
|----|---------------------|----------------|----------------------------------|---------|----------|--------------------------------|
| 1  | AU-Cumberland       | Australia      | TERN-SuperSites, AusCover/OzFlux | -33.615 | 150.723  | Broadleaved, evergreen         |
| 2  | AU-Great-Western    | Australia      | TERN-SuperSites, AusCover/OzFlux | -30.192 | 120.654  | Broadleaved, deciduous, open   |
| 3  | AU-Litchfield       | Australia      | TERN-SuperSites, AusCover/OzFlux | -13.180 | 130.790  | Broadleaved, evergreen         |
| 4  | AU-Robson-Creek     | Australia      | TERN-SuperSites, AusCover/OzFlux | -17.117 | 145.630  | Broadleaved, evergreen         |
| 5  | IT-Tra              | Italy          | CORE                             | 37.646  | 12.867   | Cropland                       |
| 6  | SP-Ali              | Spain          | CORE                             | 38.452  | -1.065   | Cropland                       |
| 7  | US-Moab-Site        | United States  | NEON, AERONET                    | 38.248  | -109.388 | Shrub, closed-open, deciduous  |
| 8  | US-Talladega        | United States  | NEON, AERONET                    | 32.950  | -87.393  | Needle-leaved, evergreen       |
| 9  | AU-Wombat           | Australia      | TERN-SuperSites, AusCover/OzFlux | -37.422 | 144.094  | Broadleaved, evergreen         |
| 10 | FR-Guayaflux        | France         | ICOS Associated                  | 5.279   | -52.925  | Broadleaved, evergreen         |
| 11 | FR-Hesse            | France         | ICOS                             | 48.674  | 7.065    | Broadleaved, deciduous, closed |
| 12 | US-Harvard          | United States  | NEON, AERONET                    | 42.537  | -72.173  | Broadleaved, deciduous, closed |
| 13 | US-Mountain-Lake    | United States  | NEON, AERONET                    | 37.378  | -80.525  | Broadleaved, deciduous, closed |
| 14 | AU-Calperum         | Australia      | TERN-SuperSites, AusCover/OzFlux | -34.003 | 140.588  | Shrub, closed-open, deciduous  |
| 15 | AU-Cape-Tribulation | Australia      | TERN-SuperSites, OzFlux          | -16.106 | 145.378  | Broadleaved, evergreen         |
| 16 | AU-Rushworth        | Australia      | TERN-AusCover                    | -36.753 | 144.966  | Broadleaved, deciduous, open   |
| 17 | AU-Tumbarumba       | Australia      | TERN-SuperSites, AusCover/OzFlux | -35.657 | 148.152  | Broadleaved, evergreen         |
| 18 | FR-Puechabon        | France         | ICOS                             | 43.741  | 3.596    | Needle-leaved, evergreen       |
| 19 | IT-Cat              | Italy          | CORE                             | 37.279  | 14.883   | Cropland                       |
| 20 | IT-Lison            | Italy          | ICOS                             | 45.740  | 12.750   | Cropland                       |
| 21 | US-Central-Plains   | United States  | NEON, AERONET                    | 40.816  | -104.746 | Shrub, closed-open, deciduous  |
| 22 | US-Oak-Rige         | United States  | NEON, AERONET                    | 35.964  | -84.283  | Broadleaved, deciduous, closed |
| 23 | AU-Watts-Creek      | Australia      | TERN-AusCover                    | -37.689 | 145.685  | Broadleaved, evergreen         |
| 24 | CR-Santa-Rosa       | Costa Rica     | ENVIRONET                        | 10.842  | -85.616  | Broadleaved, evergreen         |
| 25 | FR-Montiers         | France         | ICOS                             | 48.538  | 5.312    | Broadleaved, deciduous, closed |
| 26 | UK-Wytham-Woods     | United Kingdom | ForestGeo - NPL                  | 51.774  | -1.338   | Broadleaved, deciduous, closed |
| 27 | US-Bartlett         | United States  | NEON, AERONET                    | 44.064  | -71.287  | Broadleaved, deciduous, closed |
| 28 | AU-Warra-Tall       | Australia      | TERN-SuperSites, AusCover/OzFlux | -43.095 | 146.654  | Broadleaved, evergreen         |
| 29 | BR-Mata-Seca        | Brazil         | ENVIRONET                        | -14.880 | -43.973  | Herbaceous, closed-open        |
| 30 | IT-Collelongo       | Italy          | EFDC                             | 41.849  | 13.588   | Broadleaved, deciduous, closed |
| 31 | SE-Dahra            | Senegal        | KIT / UC                         | 15.400  | -15.430  | Cultivated and managed areas   |
| 32 | AU-Zigzag-Creek     | Australia      | TERN-AusCover                    | -37.474 | 148.339  | Broadleaved, evergreen         |
| 33 | FR-Estrees-Mons     | France         | ICOS Associated                  | 49.872  | 3.021    | Cultivated and managed areas   |
| 34 | DE-Selhausen        | Deutschland    | ICOS                             | 50.866  | 6.447    | Cropland                       |
| 35 | NE-Loobos           | Netherlands    | ICOS Associated                  | 52.166  | 5.744    | Needle-leaved, evergreen       |
| 36 | DE-Geb              | Deutschland    | CORE                             | 51.100  | 10.914   | Cropland                       |
| 37 | FR-Aurade           | France         | ICOS                             | 43.550  | 1.106    | Cropland                       |
